# Supplementary material for: Exploring temporal and sex-linked dysregulation in Alzheimer disease phosphoproteome
Source: PubMed Central journal article supplement — iScience. 2024 Sep 13;27(10):110941. doi: 10.1016/j.isci.2024.110941 (PMC11465087; doi:10.1016/j.isci.2024.110941), 2024-09-13
Supplement: mmc9.pdf [file mmc9.pdf]

## Supplementary Text

### Statistical inference at protein level

To identify phosphopeptides that are significant, we perform moderated t-test, comparing the 5XFAD samples with the wildtype (WT) samples. Let  $q[i]$  be the resultant log2 fold change, and  $\sigma[i]$ ,  $df[i]$  be the corresponding standard error and degrees of freedom obtained from moderated t-test for peptide  $i$ .

To identify potential biomarkers based on phosphorylation data that are consistent across time points, we perform the analysis at the protein level. For this purpose, we first compute the mean log-fold changes  $q_p[j]$  for each protein  $j$ :

$$q_p[j] = \frac{\sum_{i \in \mathcal{V}_j} q[i]}{|\mathcal{V}_j|} \quad (1)$$

where  $\mathcal{V}_j$  denotes the set of phosphopeptides corresponding to protein  $j$ .

To estimate the pooled standard error  $\sigma_p[j]$  and the corresponding degrees of freedom  $df_p[j]$  in the estimation of the mean log-fold changes for each protein  $j$ , we use the Satterthwaite approximation:

$$\begin{aligned} \sigma_p[j] &= \frac{\sqrt{\sum_{i \in \mathcal{V}_j} \sigma^2[i]}}{|\mathcal{V}_j|} \\ df_p[j] &= \frac{\left(\sum_{i \in \mathcal{V}_j} \sigma^2[i]\right)^2}{\sum_{i \in \mathcal{V}_j} \left(\frac{\sigma^4[i]}{df[i]}\right)} \end{aligned} \quad (2)$$

Based on these estimations, to compute the significance of a protein  $j$ , a t-test is performed with the t-statistic  $t_p[j]$ :

$$t_p[j] = \frac{q_p[j]}{\sigma_p[j]} \quad (3)$$

which follows a t-distribution with  $df_p[j]$  degrees of freedom under the null hypothesis.

### Statistical tests to identify sex differences

Let  $q_{\text{male}}[i]$  denote the log2 fold change, and  $\sigma_{\text{male}}[i]$ ,  $df_{\text{male}}[i]$  denote the corresponding standard error and degrees of freedom for obtained from t-test for the male group for phosphosite  $i$ . Similarly, let  $q_{\text{female}}[i]$ ,  $\sigma_{\text{female}}[i]$ ,  $df_{\text{female}}[i]$  denote the resulting values for the female group. The log2 fold change for the sex difference between the two groups is given by:

$$q_{\text{sexdif}}[i] = q_{\text{female}}[i] - q_{\text{male}}[i] \quad (4)$$

Since the male and female groups consist of independent set of samples, with the equal variance assumption, the corresponding standard error and degrees of freedom for  $q_{\text{sexdif}}[i]$  is as follows:

$$\begin{aligned} \sigma_{\text{sexdif}}[i] &= \sqrt{\frac{df_{\text{female}}[i]\sigma_{\text{female}}^2[i] + df_{\text{male}}[i]\sigma_{\text{male}}^2[i]}{df_{\text{sexdif}}[i]}} \\ df_{\text{sexdif}}[i] &= df_{\text{female}}[i] + df_{\text{male}}[i] \end{aligned} \quad (5)$$

After this step, similar to the individual tests done before, we enhance the degrees of freedom for individual variances by applying a moderated t-test, utilizing the *squeezeVar* function from the *limma* package in R to shrink sample variances towards a common value. Based on these, the p-values and statistical significance are computed as usual from the t-distribution.

Note that, this test corresponds to the following linear model where sex is used as a covariate:

$$\begin{aligned} & \sim (\mathbf{x}_{\text{female}}^{5\text{XFAD}}[i] - \mathbf{x}_{\text{female}}^{\text{Control}}[i]) - (\mathbf{x}_{\text{male}}^{5\text{XFAD}}[i] - \mathbf{x}_{\text{male}}^{\text{Control}}[i]) \\ & = \mathbf{x}_{\text{female}}^{5\text{XFAD}}[i] - \mathbf{x}_{\text{female}}^{\text{Control}}[i] - \mathbf{x}_{\text{male}}^{5\text{XFAD}}[i] + \mathbf{x}_{\text{male}}^{\text{Control}}[i] \end{aligned} \quad (6)$$

where  $\mathbf{x}$  denote the mean log2 intensities for the samples in the corresponding group.

## Consistency analysis to identify protein biomarkers

To assess consistency across time points, we introduce a simple statistic called the consistency score, which combines the log2-fold change results of individual time points. This score represents the total log2-fold change of proteins across time points, considering any missing values as log2-fold change of 0.

Let  $\mathcal{T} = \{3 \text{ month}, 6 \text{ month}, 9 \text{ month}\}$  denote the set of time points, and let  $q_p^{(t)}[j]$ ,  $\sigma_p^{(t)}[j]$ , and  $df_p^{(t)}[j]$  respectively denote the log-fold changes, standard error, and the degrees of freedom for protein  $j$  corresponding to the analysis performed for time point  $t \in \mathcal{T}$ . Based on these, we compute the consistency score  $q_c[j]$  (i.e., total log fold change) for protein  $j$  as follows:

$$q_c[j] = \sum_{t \in \mathcal{T}} q_p^{(t)}[j] \quad (7)$$

The corresponding standard error  $\sigma_c[j]$  and the degrees of freedom  $df_c[j]$  for the consistency score are estimated by the Satterthwaite approximation:

$$\begin{aligned} \sigma_c[j] &= \sqrt{\sum_{t \in \mathcal{T}} (\sigma_p^{(t)}[j])^2} \\ df_c[j] &= \frac{\left( \sum_{t \in \mathcal{T}} (\sigma_p^{(t)}[j])^2 \right)^2}{\sum_{t \in \mathcal{T}} \left( \frac{(\sigma_p^{(t)}[j])^4}{df_p^{(t)}[j]} \right)} \end{aligned} \quad (8)$$

Note that, if a protein  $j$  have a missing data at time point  $t$ , we consider it to have  $q_p^{(t)}[j] = 0$ ,  $\sigma_p^{(t)}[j] = 0$  and  $df_p^{(t)}[j] = \infty$  during the computation of the consistency score.

## Statistical inference at pathway level

To understand the biological pathways and networks impacted by the observed phosphoproteome changes, we performed a quantitative pathway enrichment analysis based on the mean phosphorylation (log2-FC) of proteins.

Let  $\mathcal{P}_k$  denote the set of proteins corresponding to pathway  $k$  with non-missing data (i.e., each protein having at least one phosphopeptide identified in our dataset). To estimate the enrichment of pathway  $k$ , we compute the mean log fold change  $q_e[k]$  for each protein in  $\mathcal{P}_k$  as follows:

$$q_e[k] = \frac{\sum_{j \in \mathcal{P}_k} q_p[j]}{|\mathcal{P}_k|} \quad (9)$$

The corresponding standard error  $\sigma_e[j]$  and the degrees of freedom  $df_e[j]$  for the consistency score are estimated by the Satterthwaite approximation:

$$\begin{aligned} \sigma_e[k] &= \frac{\sqrt{\sum_{j \in \mathcal{P}_k} \sigma_p^2[j]}}{|\mathcal{P}_k|} \\ df_e[k] &= \frac{\left(\sum_{j \in \mathcal{P}_k} \sigma_p^2[j]\right)^2}{\sum_{j \in \mathcal{P}_k} \left(\frac{\sigma_p^4[j]}{df_p[j]}\right)} \end{aligned} \quad (10)$$

Similar to the protein analysis, the statistical significance of a pathway  $k$  is then assessed with a t-test, based on the t-statistic:

$$t_e[k] = \frac{q_e[k]}{\sigma_e[k]} \quad (11)$$

which follows a t-distribution with  $df_e[k]$  degrees of freedom under the null hypothesis.
